# Supplementary material for: A New Jasmine Virus C Isolate Identified by Nanopore Sequencing Is Associated to Yellow Mosaic Symptoms of Jasminum officinale in Italy
Source: MDPI journal article supplement (doi:10.3390/plants11030309), 2022-01-24
Supplement: s1 [file s1]

# A new jasmine virus C isolate identified by nanopore sequencing is associated to yellow mosaic symptoms of *Jasminum officinale* in Italy

Serafina Serena Amoia, Angelantonio Minafra, Vittorio Nicoloso, Giuliana Loconsole, Michela Chiumenti\*

Institute for Sustainable Plant Protection – National Research Council, Via Amendola, 165/A, 70126 Bari - Italy

\*Corresponding author: [michela.chiumenti@ipsp.cnr.it](mailto:michela.chiumenti@ipsp.cnr.it) (M.C.)

## **Supplementary Files**

### **Supplementary Table S1.**

Specific primers designed on the genomic sequence of jasmine virus C isolate Bari. The primers were used for RT-PCR initial confirmation on the infected plants, for viral detection in the survey and for sequencing of the 3' end portion (3' end RACE). Non-viral sequences are in italics. Nucleotide positions are on the consensus sequence deposited in GenBank (Acc. nr. OL828237).

### **Supplementary Table S2.**

List of all the viruses cited and used in the elaborations (pairwise matrices, phylogenetic trees, Suppl. Figure S2) with available ICTV official abbreviations. The accession numbers as proteins ID (GenBank) or reference nucleotide genomes are reported.

### **Supplementary Table S3.**

Matrix of pairwise identities of coat proteins amino acid sequences among jasmine virus C isolates and other member species in the *Carlavirus* genus.

### **Supplementary Table S4.**

Matrix of pairwise identities of replicases amino acid sequences among jasmine virus C isolates and other member species in the *Carlavirus* genus.

### **Supplementary Table S5.**

List of the most frequent nucleotide polymorphic sites retrieved in jasmine virus C Bari isolate genomic consensus sequence (produced by Illumina sequencing with an average coverage of 8.81x). Lower and higher frequency values are highlighted in yellow. Amino acid residues changes are reported when a non-synonymous mutation is present in the codon (in red either the nucleotide change and amino acids of a different structural type).

### **Supplementary Figure S1.**

Graphic representation of InterPro and CCD protein domain searches and annotations, including summary tables described in the genome of jasmine virus C Bari isolate. (A) ORF 1, Replicase domains. (B) ORF 2, Triple Gene Block 1. (C) ORF 3, Triple Gene Block 2. (D) ORF 4, Triple Gene Block 3. (E) ORF 5, Coat Protein. (F) ORF 6, Nucleic Acid Binding protein.

**Supplementary Figure S2.**

Alignment (obtained with Clustal Omega; <https://www.ebi.ac.uk/Tools/msa/clustalo/>) of the nucleic acid binding proteins (ORF6 protein) of JaVC available in GenBank. Amino acid residues of the Bari isolate (from *J. officinale*) that diverge in the position from the almost invariant residues aligned from all the other isolates (from *J. sambac*) are in red. Accession numbers: Yunnan, MH389795; A31 Taiwan, KX364696; Fujian, MH231174; Guangdong, MH389788; Guangxi, MH389789; Hunan, MH389790; Jilin, MH389791; Sichuan, MH389793; Jangsu, MH389792; Shandong, MH389794.

**Supplementary Figure S3.**

Alignment (obtained with Clustal Omega; <https://www.ebi.ac.uk/Tools/msa/clustalo/>) of coat proteins of selected *Carlavirus* members used to calculate the pairwise percentage similarity among aphid-transmitted and whitefly-transmitted species. Melon: melon yellowing-associated virus, MYaV, NC\_038324; cowpea: cowpea mild mottle virus, CPPMV; carya: *Carya illinoensis* carlavirus 1, MW328759; narcissus: Narcissus common latent virus, NCLV, NC\_008266; A-31: jasmine virus C, Taiwan isolate A-31, KX364696; carnation: carnation latent virus, CLV, MN450069; shallot: shallot latent virus, SLV, NC\_003557

**Supplementary Table S1.** Specific primers designed on the genomic sequence of jasmine virus C isolate Bari. The primers were used for RT-PCR initial confirmation on the infected plants, for viral detection in the survey and for sequencing of the 3' end portion (3' end RACE). Non-viral sequences are in italics. Nucleotide positions are on the consensus sequence deposited in GenBank (Acc. nr. OL828237).

| Primer Name       | Sequence (5' -> 3')                            | Position (nt) | Product Size (bp) |
|-------------------|------------------------------------------------|---------------|-------------------|
| <b>Detection</b>  |                                                |               |                   |
| Jvc_R2_for        | 5'-GAGCAAAGTGGGACTGATGCCT-3'                   | 2975-2997     | 164               |
| Jvc_R2_rev        | 5'-CTCTGATATTCTCTGCAGCCCTT-3'                  | 3116-3138     |                   |
|                   |                                                |               |                   |
| Jvc_R3/5_for      | 5'-CCTCAAACAGGATGCCGGCACTC-3'                  | 7750-7772     | 213               |
| Jvc_R3/5_rev      | 5'-GACTGATCAGGCGACCTACTCC-3'                   | 7941-7962     |                   |
|                   |                                                |               |                   |
| Jvc_rN3_for       | 5'-CCGCCGTTGTACATTCCTATCC-3'                   | 268-289       | 1336              |
| Jvc_r1_REV        | 5'-AGCACTTTCACCACCAATGCT-G                     | 1582-1603     |                   |
| <b>3' RACE</b>    |                                                |               |                   |
| J3'for            | 5'-GGGCGAAATCCATTTCTAGATG-3'                   | 8249-8270     | 243               |
| J3' cDNA RACE     | 5'-GGCCACGCGTCGACTAGTACGTTTTTTTTTTTTTTTTTTN-3' |               |                   |
| J3-RACE Rev (Tag) | 5'-GGCCACGCGTCGACTAGTACG-3'                    |               |                   |

**Supplementary Table S2.** List of all the viruses cited and used in the elaborations (pairwise matrices, phylogenetic trees, Suppl. Figure S2) with available ICTV official abbreviations. The accession numbers as proteins ID (GenBank) or reference nucleotide genomes are reported.

| Abbreviation | Species                           | Accession number<br>CP | Accession number<br>replicase |
|--------------|-----------------------------------|------------------------|-------------------------------|
| AcLV         | Aconitum latent virus             | BAB56118               | NP_116487                     |
| ACLSV        | Apple chlorotic leafspot virus    | AAA42589               | AAA42587                      |
| AHLV         | American hop latent virus         | AFI61523               | YP_006297586                  |
| ASPV         | Apple stem pitting virus          | BAA04857               | BAA04853                      |
| AtrMoV       | Atractylodes mottle virus         | AKZ66618               | YP_009508317                  |
| BISV         | Blueberry scorch virus            | NP612812               | AAY18403                      |
| ButMV        | Butterbur mosaic virus            | BAI49696               | QQX32740                      |
| CLV          | Carnation latent virus            | CAA09306               | QJX15400                      |
| -            | Carya illinoensis carlavirus 1    | QQG34676               | QQG34672                      |
| CVB          | Chrysanthemum virus B             | CAM35757               | CAO78688                      |
| CVR          | Chrysanthemum virus R             | YP009553180            | YP_009553176                  |
| CoLV         | Cole latent virus                 | QGN03517               | QGN03513                      |
| CoMMV        | Cole mild mosaic virus            | QGN03509               | QGN03507                      |
| CVNV         | Coleus vein necrosis virus        | ABS89249               | EF527260                      |
| CPMMV        | Cowpea mild mottle virus          | ADQ54111               | HQ184471                      |
| DVS          | Daphne virus S                    | CAF04331               | BAU20378                      |
| EIVC         | Elderberry carlavirus C           | YP009224944            | YP_009224940                  |
| EIVE         | Elderberry carlavirus E           | ALY33533               | YP_009224952                  |
| GalLV        | Gaillardia latent virus           | AHN84515               | YP_009022064                  |
| GaVA         | Garlic virus A                    | BAA61810               | BAA61806                      |
| HelVS        | Helenium virus S                  | BAA01248               | QQX32728                      |
| HNNV         | Helleborus net necrosis virus     | ACM45983               | FJ196835                      |
| HLV          | Hippeastrum latent virus          | AAZ15110               | YP_002308447                  |
| HpLV         | Hop latent virus                  | BAB13716               | AJR19303                      |
| HpMV         | Hop mosaic virus                  | ACB32253               | YP_001798592                  |
| HdCMV        | Hydrangea chlorotic mottle virus  | ACE78185               | YP_002985636                  |
| KLV          | Kalanchoe latent virus            | ACL01038               | FJ531634                      |
| LNRSV        | Ligustrum necrotic ringspot virus | ABW69738               | QUP51755                      |
| LVA          | Ligustrum virus A                 | AOO96603               | YP_009288956                  |
| LSV          | Lily symptomless virus            | CAD56794               | QBS17038                      |
| MYaV         | Melon yellowing-associated virus  | NC_038324.1            | -                             |
| MjMV         | Mirabilis jalapa mottle virus     | AEQ35304               | YP_004901680                  |
| NCLV         | Narcissus common latent virus     | CAC85384               | YP_699983                     |
| NCLV         | Narcissus common latent virus     | YP_699987              | CAJ43609                      |
| OVH          | Opuntia virus H                   | ANH10858               | ANH10854                      |
| PLV          | Passiflora latent virus           | ABE97939               | QWT83583                      |
| PhIVB        | Phlox Virus B                     | ABW05096               | YP_001552317                  |
| PhIVM        | Phlox virus M                     | YP_009664747           |                               |
| PhIVS        | Phlox virus S                     | ABP37860               | YP_001165301                  |
| PVM          | Potato virus M                    | BAA03343               | QBL75476                      |
| PVM          | Potato virus M                    | ASV70527               | -                             |
| PVS          | Potato virus S                    | CAI06119               | QNN79442                      |
| SLV          | Shallot latent virus              | NC_003557.1            | -                             |
| -            | Stevia carlavirus 1               | QQG34563               | QQG34559                      |
| -            | Tagetes carlavirus 1              | QQG34557               | QQG34553                      |
| YLV          | Yam latent virus                  | AJD23369               | YP_009134730                  |

Matrix of pairwise identities of coat proteins amino acid sequences among jasmine virus C isolates and other member species in the *Carlavirus* genus.

5

Matrix of pairwise identities of replicases amino acid sequences among jasmine virus C isolates and other member species in the *Carlavirus* genus.

6

## Supplementary Table S5.

List of the most frequent nucleotide polymorphic sites retrieved in jasmine virus C Bari isolate genomic consensus sequence (produced by Illumina sequencing with an average coverage of 8.81x). Lower and higher frequency values are highlighted in yellow. Amino acidic residues changes are reported when a non-synonymous mutation is present in the codon (in red either the nucleotide change and amino acids of a different structural type).

| Name | Gene | Position | Length | Change | Polymorphism Type  | Variant Frequency | P-Value  | Codon | Amino acid | Changes |   |
|------|------|----------|--------|--------|--------------------|-------------------|----------|-------|------------|---------|---|
| T    | ORF1 | 668      | 1      | C->T   | SNP (transition)   | 19.7%             | 2.7E-33  | GAc   | D=D        |         |   |
| G    | "    | 716      | 1      | A->G   | SNP (transition)   | 11.9%             | 1.8E-26  | GTa   | V=V        |         |   |
| T    | "    | 941      | 1      | C->T   | SNP (transition)   | 16.7%             | 1.6E-63  | GTc   | V=V        |         |   |
| C    | "    | 1001     | 1      | T->C   | SNP (transition)   | 11.7%             | 3.4E-19  | CCt   | P=P        |         |   |
| T    | "    | 1052     | 1      | C->T   | SNP (transition)   | 48.6%             | 2.3E-128 | AGc   | S=S        |         |   |
| T    | "    | 1250     | 1      | C->T   | SNP (transition)   | 23.2%             | 2.1E-73  | GGc   | G=G        |         |   |
| G    | "    | 1525     | 1      | C->G   | SNP (transversion) | 19.8%             | 2.3E-50  | AcC   | T          | AgC     | S |
| T    | "    | 1544     | 1      | C->T   | SNP (transition)   | 11.0%             | 7.5E-25  | TTc   | F=F        |         |   |
| A    | "    | 1617     | 1      | T->A   | SNP (transversion) | 13.8%             | 3.0E-29  | tGC   | C          | aGC     | S |
| G    | "    | 1908     | 1      | A->G   | SNP (transition)   | 25.4%             | 1.2E-36  | aAA   | K          | gAA     | E |
| G    | "    | 1940     | 1      | A->G   | SNP (transition)   | 10.5%             | 1.4E-13  | AGa   | R=R        |         |   |
| A    | "    | 2046     | 1      | G->A   | SNP (transition)   | 10.8%             | 1.4E-27  | TTg   | L=L        |         |   |
| T    | "    | 2432     | 1      | C->T   | SNP (transition)   | 17.6%             | 2.8E-42  | GTc   | V=V        |         |   |
| A    | "    | 3086     | 1      | T->A   | SNP (transversion) | 12.4%             | 1.6E-31  | CGt   | R=R        |         |   |
| A    | "    | 3242     | 1      | T->A   | SNP (transversion) | 11.3%             | 8.7E-22  | GTt   | V=V        |         |   |
| A    | "    | 3278     | 1      | G->A   | SNP (transition)   | 10.0%             | 2.1E-12  | GAg   | E=E        |         |   |
| G    | "    | 3485     | 1      | A->G   | SNP (transition)   | 49.5%             | 3.9E-139 | CTa   | L=L        |         |   |
| T    | "    | 3560     | 1      | C->T   | SNP (transition)   | 16.8%             | 3.3E-34  | CAc   | H=H        |         |   |
| G    | "    | 3944     | 1      | A->G   | SNP (transition)   | 54.5%             | 2.1E-150 | ACa   | T=T        |         |   |
| G    | "    | 4004     | 1      | A->G   | SNP (transition)   | 16.4%             | 4.5E-27  | CGa   | R=R        |         |   |
| G    | "    | 4245     | 1      | A->G   | SNP (transition)   | 10.1%             | 2.8E-20  | aTC   | I          | gTC     | V |
| C    | "    | 4417     | 1      | T->C   | SNP (transition)   | 17.3%             | 1.4E-40  | GtG   | V          | GcG     | A |
| C    | "    | 4538     | 1      | T->C   | SNP (transition)   | 45.5%             | 5.4E-81  | GGt   | G=G        |         |   |
| A    | "    | 4844     | 1      | C->A   | SNP (transversion) | 13.9%             | 1.1E-19  | GTc   | V=V        |         |   |
| C    | "    | 5084     | 1      | T->C   | SNP (transition)   | 14.2%             | 6.1E-31  | GGt   | G=G        |         |   |
| C    | "    | 5165     | 1      | T->C   | SNP (transition)   | 36.7%             | 1.0E-106 | TGt   | C=C        |         |   |
| C    | "    | 5729     | 1      | T->C   | SNP (transition)   | 11.9%             | 3.4E-45  | ATt   | I=I        |         |   |
| C    | "    | 5900     | 1      | T->C   | SNP (transition)   | 18.3%             | 3.1E-45  | GTt   | V=V        |         |   |
| G    | TGB1 | 6236     | 1      | A->G   | SNP (transition)   | 29.5%             | 5.7E-67  | CaA   | Q          | CgA     | R |
| G    | TGB1 | 6366     | 1      | A->G   | SNP (transition)   | 13.7%             | 7.7E-36  | AGa   | R=R        |         |   |
| A    | TGB3 | 7145     | 1      | T->A   | SNP (transversion) | 11.1%             | 3.1E-10  | AtT   | I          | AaT     | N |
| A    | CP   | 7318     | 1      | T->A   | SNP (transversion) | 11.5%             | 1.7E-14  | GCt   | A=A        |         |   |

**Supplementary Figure S1.** Graphic representation of InterPro and CCD protein domain searches and annotations, including summary tables described in the genome of jasmine virus C Bari isolate. (A) ORF 1, Replicase domains. (B) ORF 2, Triple Gene Block 1. (C) ORF 3, Triple Gene Block 2. (D) ORF 4, Triple Gene Block 3. (E) ORF 5, Coat Protein. (F) ORF 6, Nucleic Acid Binding protein.

**(A) ORF 1, Replicase domains.**

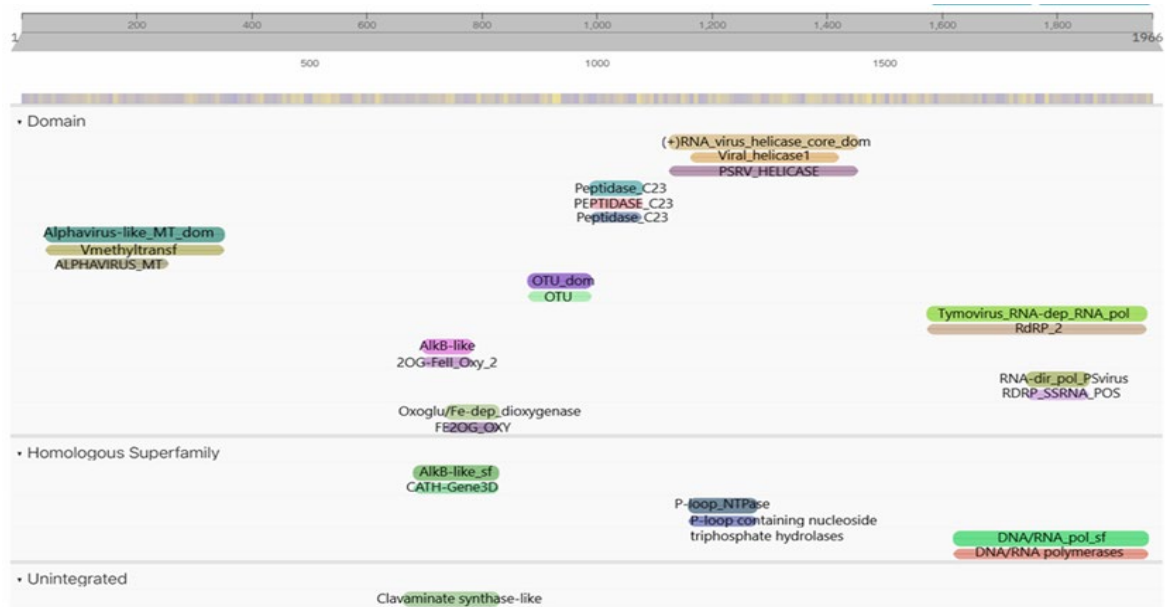

| InterPro Name                  | InterPro ID | InterPro Type          | Database    | Database ID        | Start | End  | Length |
|--------------------------------|-------------|------------------------|-------------|--------------------|-------|------|--------|
| Alphaviruslike_MT_dom          | IPR002588   | Domain                 |             |                    | 43    | 351  | 308    |
| Vmethyltransf                  |             |                        | Pfam        | PF01660            | 43    | 351  | 308    |
| ALPHAVIRUS_MT                  |             |                        | PROSITE     | PS51743            | 63    | 254  | 191    |
| AlkB-like_sf                   | IPR037151   | homologous superfamily |             |                    | 681   | 828  | 147    |
| 2OG-Fell_Oxy_2                 |             |                        | Pfam        | PF13532            | 698   | 783  | 85     |
| CATH-Gene3D                    |             |                        |             | G3DSA:2.60.120.590 | 681   | 828  | 147    |
| Clavaminatase synthase-like    |             | Unintegrated           | SUPERFAMILY | SSF51197           | 690   | 828  | 138    |
| Oxoglu/Fe-dep_dioxygenase      | IPR005123   | Domain                 |             |                    | 738   | 829  | 91     |
| FE2OG_OXY                      |             |                        | PROSITE     | PS51471            | 738   | 829  | 91     |
| OTU_dom                        | IPR003323   | Domain                 |             |                    | 882   | 990  | 108    |
| OTU                            |             |                        | PROSITE     | OTU                | 882   | 990  | 108    |
| Peptidase_C23                  | IPR008041   | Domain                 |             |                    | 989   | 1079 | 90     |
| Peptidase_C23                  |             |                        | PROSITE     | PS51492            | 989   | 1079 | 90     |
| Peptidase_C23                  |             |                        | Pfam        | PF05379            | 990   | 1077 | 87     |
| (+)RNA_virus_helicase_core_dom | IPR027351   | Domain                 |             |                    | 1138  | 1460 | 322    |
| Viral_helicase1                |             |                        | Pfam        | PF01443            | 1164  | 1420 | 256    |
| PSRV_HELICASE                  |             |                        | PROSITE     | PS51657            | 1138  | 1460 | 322    |
| Tymovirus_RNAdep_RNApol        | IPR001788   | Domain                 |             |                    | 1576  | 1955 | 379    |
| RdRP_2                         |             |                        | Pfam        | PF00978            | 1576  | 1955 | 379    |
| RNA-dir_pol_Psvirus            | IPR007094   | Domain                 |             |                    | 1748  | 1955 | 207    |
| RDRP_SSRNA_POS                 |             |                        | PROSITE     | PS50507            | 1748  | 1955 | 207    |

**(B) ORF 2, Triple Gene Block 1.**

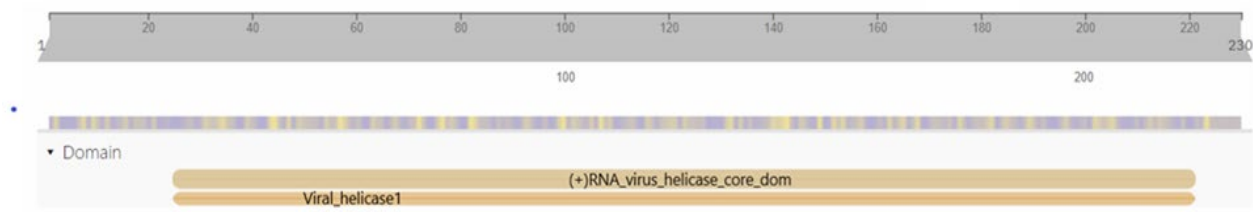

| InterPro Name                  | InterPro ID | InterPro Type | Database | Database ID | Start | End | Length |
|--------------------------------|-------------|---------------|----------|-------------|-------|-----|--------|
| (+)RNA_virus_helicase_core_dom | IPR027351   | Domain        |          |             | 25    | 221 | 196    |
| Viral_helicase1                |             |               | Pfam     | PF01443     | 25    | 221 | 196    |

### (C) ORF 3, Triple Gene Block 2.

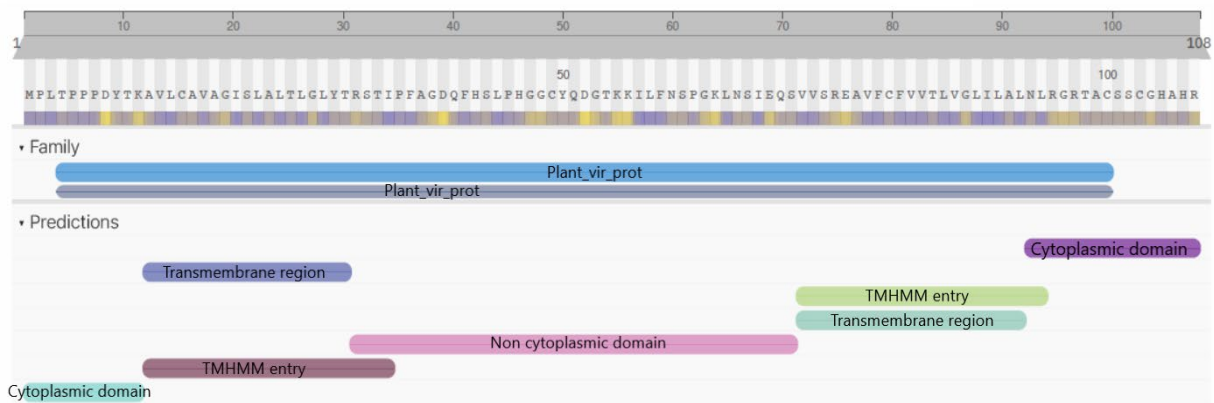

| InterPro Name          | InterPro ID | InterPro Type | Database | Database ID            | Start | End | Length |
|------------------------|-------------|---------------|----------|------------------------|-------|-----|--------|
| Cytoplasmic domain     |             |               | PHOBIUS  | CYTOPLASMIC_DOMAIN     | 1     | 11  | 11     |
| Plant_vir_prot         | IPR001896   | Family        |          |                        | 4     | 99  | 95     |
| Plant_vir_prot         |             |               | Pfam     | PF01307                | 4     | 99  | 95     |
| Transmembrane region   |             |               | PHOBIUS  | TRANSMEMBRANE          | 12    | 30  | 18     |
| Non cytoplasmic domain |             |               | PHOBIUS  | NON_CYTOPLASMIC_DOMAIN | 31    | 71  | 40     |
| TMHMM                  |             |               | TMHMM    | TMhelix                | 72    | 94  | 22     |
| Transmembrane region   |             |               | PHOBIUS  | TRANSMEMBRANE          | 72    | 92  | 20     |
| Cytoplasmic domain     |             |               | PHOBIUS  | CYTOPLASMIC_DOMAIN     | 93    | 108 | 15     |

**(D) ORF 4, Triple Gene Block 3.**

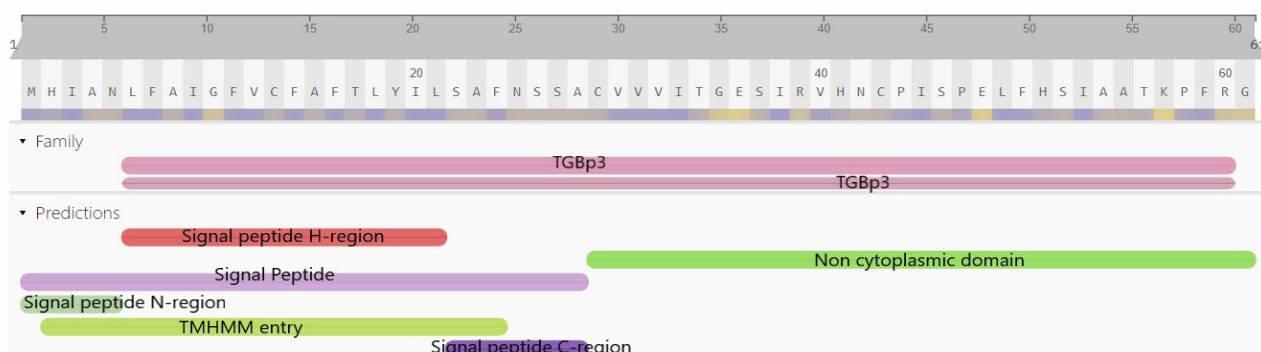

| InterPro Name           | InterPro ID | InterPro Type | Database | Database ID             | Start | End | Length |
|-------------------------|-------------|---------------|----------|-------------------------|-------|-----|--------|
| TGBp3                   | IPR003411   | Family        |          |                         | 6     | 60  | 54     |
| TGBp3                   | PF02495     |               | Pfam     |                         | 6     | 60  | 54     |
| Signal peptide H-region |             |               | PHOBIUS  | SIGNAL_PEPTIDE_H_REGION | 6     | 21  | 15     |
| Signal Peptide          |             |               | PHOBIUS  | SIGNAL_PEPTIDE          | 1     | 28  | 28     |
| Signal peptide N-region |             |               | PHOBIUS  | SIGNAL_PEPTIDE_N_REGION | 1     | 5   | 5      |
| Signal peptide C-region |             |               | PHOBIUS  | SIGNAL_PEPTIDE_C_REGION | 22    | 28  | 6      |
| TMHMM                   |             |               | TMhelix  | TMHMM                   | 2     | 24  | 22     |
| Non cytoplasmic domain  |             |               | PHOBIUS  | NON_CYTOPLASMIC_DOMAIN  | 29    | 61  | 32     |

**(E) ORF 5, Coat Protein.**

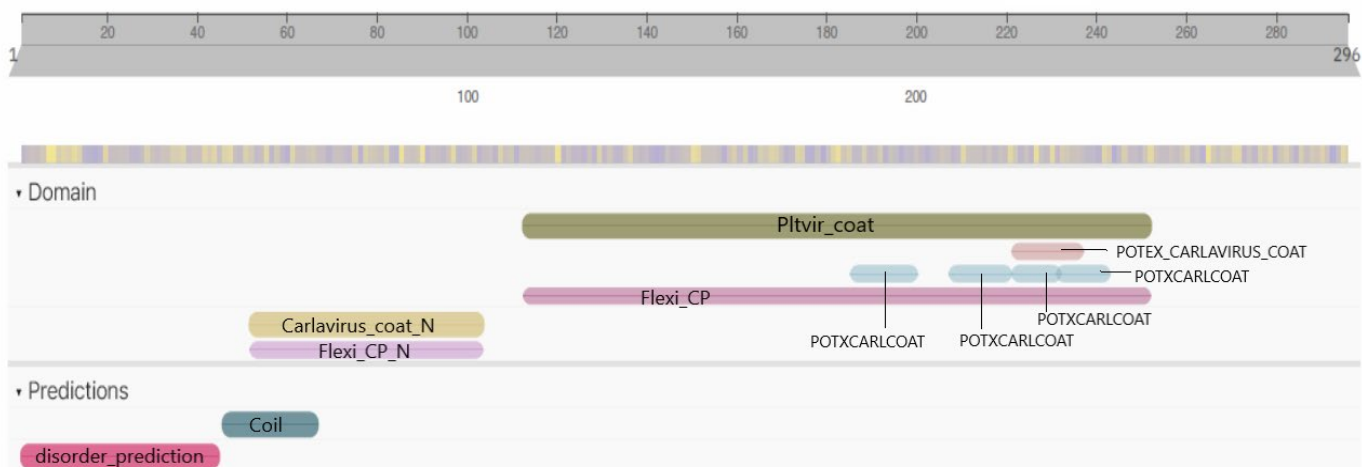

| InterPro Name       | InterPro ID  | InterPro Type | Database    | Database ID | Start | End | Length |
|---------------------|--------------|---------------|-------------|-------------|-------|-----|--------|
| Disorder_prediction |              |               | MOBIDB_LITE | mobidb-lite | 1     | 42  | 42     |
| Coil                | Unintegrated |               | COILS entry | Coil        | 46    | 66  | 20     |
| Carlavirus_coat_N   | IPR013569    | Domain        |             |             | 52    | 103 | 51     |
| Flexi_CP_N          |              |               | Pfam        | PF08358     | 52    | 103 | 51     |
| Pltvir_coat         | IPR000052    | Domain        |             |             | 112   | 252 | 140    |
| Flexi_CP            |              |               | Pfam        | PF00286     | 112   | 252 | 240    |
| POTXCARLCOAT        |              |               | PRINTS      | PR00232     | 186   | 200 | 14     |
| POTXCARLCOAT        |              |               | PRINTS      | PR00232     | 208   | 221 | 13     |
| POTXCARLCOAT        |              |               | PRINTS      | PR00232     | 222   | 232 | 10     |
| POTXCARLCOAT        |              |               | PRINTS      | PR00232     | 232   | 243 | 11     |

**(F) ORF 6, Nucleic Acid Binding Protein.**

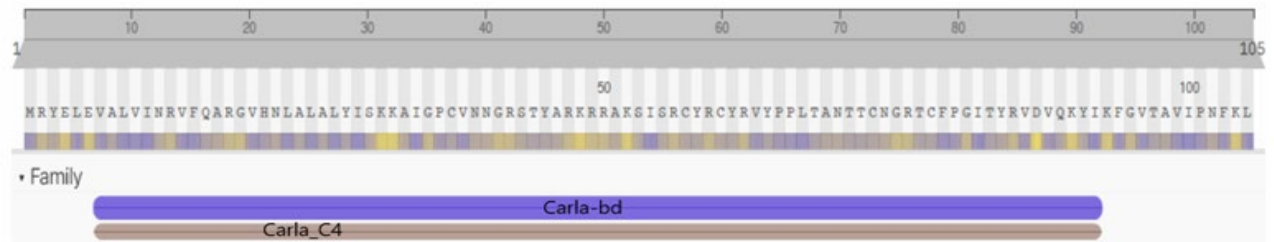

| InterPro Name | InterPro ID | InterPro Type | Database | Database ID | Start | End | Length |
|---------------|-------------|---------------|----------|-------------|-------|-----|--------|
| Carla-bd      | IPR002568   | Family        |          |             | 7     | 92  | 85     |
| Carla_C4      |             |               | Pfam     | PF01623     | 7     | 92  | 85     |

## Supplementary Figure S2.

Alignment (obtained with Clustal Omega; <https://www.ebi.ac.uk/Tools/msa/clustalo/>) of the nucleic acid binding proteins (ORF6 protein) of JaVC available in GenBank. Amino acid residues of the Bari isolate (from *J. officinale*) that diverge in the position from the almost invariant residues aligned from all the other isolates (from *J. sambac*) are in red. Accession numbers: Yunnan, MH389795; A31 Taiwan, KX364696; Fujian, MH231174; Guangdong, MH389788; Guangxi, MH389789; Hunan, MH389790; Jilin, MH389791; Sichuan, MH389793; Jangsu, MH389792; Shandong, MH389794.

|           |                                                                                   |     |
|-----------|-----------------------------------------------------------------------------------|-----|
| Bari      | MRYELEVALVINRVFQARGVHNLALALYISKKA <b>I</b> GPCVNNGRSTYARKRRRAKSISRCYRC            | 60  |
| Guangxi   | MRYELEVALIINRVFQARGVHNLALALYISKKAAGPCLNNGRSTYARRRRARSISRCYRC                      | 60  |
| Shandong  | MRYELEVALVINRVFQARGVHNLALALYISKKA <b>V</b> GPCLNNGRSTYARRRRARSISRCYRC             | 60  |
| Hunan     | MRYELEVALVINRVFQARGVHNLALALYISKKA <b>V</b> GPCLNNGRSTYARRRRARSISRCYRC             | 60  |
| Jangsu    | MRYELEVALVINRVFQARGVHNLALALYISKKA <b>V</b> GPCLNNGRSTYARRRRARSISRCYRC             | 60  |
| Jilin     | MRYELEVALVINRA <b>F</b> QARGVHNLALALYISKKA <b>V</b> GPCVNKGRSTYARRRRATSISRCYRC    | 60  |
| Fujian    | MRYELEVALVINRA <b>F</b> QARGVHNLALALYISKKA <b>V</b> GPVNNGRSTYARKRRARSISRCYRC     | 60  |
| Sichuan   | MRHELEVALAINRVFQARGVHNLALALYISKKA <b>V</b> GPCVNNGRSTYARRRRASSISRCYRC             | 60  |
| Yunnan    | MRYELEVALVINRVFQARGVHDLALALYISKKA <b>V</b> GPCVNNGRSTYARKRRRAKSISRCYRC            | 60  |
| A31       | MRYELEVALVINRVFQARGVHNLALALYISKKA <b>V</b> GPCVNNGRSTYARRRRRAKSISRCYRC            | 60  |
| Guangdong | MRYELEVALVINRVFQARGVHNLALALYISKKA <b>V</b> GPCVNNGRSTYARRRRRAKSISRCYRC            | 60  |
|           | ** :***** ***.*****:***** ** :*:*****:*** *****                                   |     |
|           |                                                                                   |     |
| Bari      | YRVYPPL <b>T</b> ANT <b>T</b> CNGRTCFFGITYRVDV <b>Q</b> KYIKFGVTA <b>V</b> IPNFKL | 105 |
| Guangxi   | YRVYPPLSGNTRCDGRTCFFGINYRVDVEEYIKFGVAAAI <b>P</b> NFKL                            | 105 |
| Shandong  | YRVYPPLSGNTRCNGRTCFFGINYRVDVEEYIKFGVAAAI <b>P</b> NFEL                            | 105 |
| Hunan     | YRVYPPLSGNTRCDGRTCFFGINYRVDVEEYIKFGVAAAI <b>P</b> NFEL                            | 105 |
| Jangsu    | YRVYPPLSGNTRCDGRTCFFGINYRVDVEEYIKFGVAAAI <b>P</b> NFKL                            | 105 |
| Jilin     | YRVYPPLCGNTRCNGRTCFFGINYRVDVEEYIKFGVAAAI <b>P</b> NFKL                            | 105 |
| Fujian    | YRVYPPLCGNTRCNGRTCFFGINYRVDVEKYIKFGVAAAI <b>P</b> NFKL                            | 105 |
| Sichuan   | YRVYPPLCGNTRCNGRTCFFGINYRVDVEKYIKFGVAAAI <b>P</b> NFKL                            | 105 |
| Yunnan    | YRVYPPLCGNTRCNGRTCFFGINYRVDVEKYIKFGVAAAI <b>P</b> NFKL                            | 105 |
| A31       | YRVYPPLCGNTRCNGRTCFFGINYRVDVEKYIKFGVAAAI <b>P</b> NFKL                            | 105 |
| Guangdong | YRVYPPLCGNTRCNGRTCFFGINYRVDVEKYIKFGVAAAI <b>P</b> NFKL                            | 105 |
|           | ***** .* ** :*****.*****:*****:*.*****:                                           |     |

### Supplementary Figure S3.

Alignment (obtained with Clustal Omega; <https://www.ebi.ac.uk/Tools/msa/clustalo/>) of coat proteins of selected Carlavirus members used to calculate the pairwise percentage similarity among aphid-transmitted and whitefly-transmitted species. Melon: melon yellowing-associated virus, MYaV, NC\_038324; cowpea: cowpea mild mottle virus, CPPMV; carya : Carya illinoensis carlavirus 1, MW328759; narcissus: Narcissus common latent virus, NCLV, NC\_008266; A-31: jasmine virus C, Taiwan isolate A-31, KX364696; carnation: carnation latent virus, CLV, MN450069; shallot: shallot latent virus, SLV, NC\_003557.

|                                                           |                                                                 |     |
|-----------------------------------------------------------|-----------------------------------------------------------------|-----|
| melon                                                     | MFSGESNDHFSSRLKKYNEVRKALVSQGKTPEEVKEELDEQVERDRKVFEGRQLAGDTGG    | 60  |
| cowpea                                                    | -----MESVFDLNKLVDSEMAEK----TK-----                              | 20  |
| carya                                                     | -----MPQKTESELAAE----AAFAKTAEEA---K-                            | 23  |
| narcissus                                                 | -----MSGAFGVDTVSESSLAAQ---KAL--DRAEA-----                       | 26  |
| JaVC_A-31                                                 | -----MS-----STSDSSKGK---RPVVIPETQT----                          | 22  |
| JaVC_Bari                                                 | -----MS-----STSDDDTKGK---KPVVIPETQT----                         | 22  |
| carnation                                                 | -----MPEKRLEEDV-----                                            | 10  |
| shallot                                                   | -----MT--NEEEEL-----                                            | 8   |
| ..                                                        |                                                                 |     |
| melon                                                     | SVVMATEKTEQKTSNPDAKDKGQSSNSKGKVE--EIK---AAQGDISDFQIARLEALKE     | 114 |
| cowpea                                                    | -----TS-----VPKAPDGTALPDIDAE LQKRLDDLRA                         | 48  |
| carya                                                     | -----RRAAEMEAKRREDKG--KDV-----ETGQRSGSQTPPEEDKLEVMLEKLID        | 67  |
| narcissus                                                 | -----NQKNADK---L-----KKFAQPESDGSDDASLEQRLNKLRE                  | 60  |
| JaVC_A-31                                                 | -----NQPPPER--PAS-----EHADSHNFEADTQEEQLEVRMQKLRQ                | 58  |
| JaVC_Bari                                                 | -----SQPPGR--PAN-----AGADTHNYEADTQEEQLEARMQKLRQ                 | 58  |
| carnation                                                 | -----GSQGQTSPPNPPQQHQGEQSVVSGMVSNEVDLRNLQNRVEEA EKFMQRFQXLKE    | 65  |
| shallot                                                   | -----NRVRNLPTRNPGTELEGRSKAV-----NDVGVMEREGFEAVLRSEDRFNKLKE      | 58  |
| : : *                                                     |                                                                 |     |
| melon                                                     | WYRANMRPSDVANPLMQSGLKQMEVTDKLEKEDSTNLYSRPALNTLLKWNRAVPVSQNIATA  | 174 |
| cowpea                                                    | FLRKTSASEITNPGFELGRPELKQSTFNSDKHTHIYGKWSIDQLSRIVPKKISNNMATA     | 108 |
| carya                                                     | YRRREYRTSRVTNAGYETGRPLLRTPSNMRGDPNSMYNMLSIDDLYAIKPKAVSNNMATA    | 127 |
| narcissus                                                 | FLRKQRGAIRVTNIGFETGRPTLNLADMRPDPSNPYNRPSIEALATIKPRAVSNNMATT     | 120 |
| JaVC_A-31                                                 | FLKQQQRATQVTNPSFELGRPKLKMLEGVRS DPTNLYNKPTIDQLCAIKPRAISSNMATS   | 118 |
| JaVC_Bari                                                 | FLKQQQRATQVTNPSFELGRPKLKM L DGVRS DPTNLYNKPTIDQLCSIKPRAISSNMATS | 118 |
| carnation                                                 | FNSQNLTAGELKNGGFESGRPPAKISEHLRGSTANVFTRPSLDALQMMDFKPESNMIVTA    | 125 |
| shallot                                                   | KCIAELSCINVTNCGWESGRPKAQLADSLKGDASNI FTRPSMDALLVRNYAPESNNLATA   | 118 |
| : * : * . . : : : : * * . : . *                           |                                                                 |     |
| melon                                                     | EDIAQITSKLESMGVPRERVRDAIFDIVLYAAHNSSSPFQTFEGDIDFRDPKFKSTFSRV    | 234 |
| cowpea                                                    | EEMAKVQITLEGLGVPTHEHVAEVL LQVAIYCKDVSSSFMDS SGTFDWKGGSI----LSD  | 164 |
| carya                                                     | EDMAKIKVSLEALGVPTTEEVSTLVAQAAIYCKDTSSEYMDPRGTFNTSAGAI----SMD    | 183 |
| narcissus                                                 | EDMMRIYTDLEGLGVPTQVQTVVIQAVLFCKDASSVFLDPRGSFEWIGGAI----SAD      | 176 |
| JaVC_A-31                                                 | QDMAAITVAIEALGVPSERIQAVLIQAVAYCKDASSSTYLD PQGVFEWGGGAV---MAD    | 174 |
| JaVC_Bari                                                 | QDMAAITVAIEALGVPSERIQAVLIQAVTYCKDASSSTYLD PQGVFEWGGGAV---MAD    | 174 |
| carnation                                                 | EELAAITAKLEGLGVPTERSAPICWAVARYCANTSTSPYTD PKGVFEFPGGAI----TRD   | 181 |
| shallot                                                   | EELAKISAKVQALGAPEECLA EVFWDICMYCTTAGSSPNVNP KGTISIGGRVV---TRD   | 174 |
| : : : : : * * * * * : . : * * * : .                       |                                                                 |     |
| melon                                                     | SVSSII-KDHSTLRKVCRLFAPIVWSYMIINNEPPANWQAKGF PENAKFASFDTFDFVTN   | 293 |
| cowpea                                                    | SVLAALRKDDNTLRRVCRLYAPITWNFMLTHKAPPSDWVAMGFKWDDRYAAAFDCFEYVEN   | 224 |
| carya                                                     | AVFAVLK TQGGTLRRVCRLYAAVTWNYMLIHDAPPSDW PAMGFKRNERFAAFDCLDYVEN  | 243 |
| narcissus                                                 | AVIAVLKKDASTLRRVCRLYAPVTWNYMLTHNAPPSDWAAMGFQHEDRFAAFDCFDYVEN    | 236 |
| JaVC_A-31                                                 | SILAILKRDAGTLRRVCRLYAPVTWNHMLAHNSPPSDWAAMGFQYTERFAAFDCFDYVEN    | 234 |
| JaVC_Bari                                                 | SILAILKRDAGTLRRVCRLYAPITWNHMLAHNSPPSDWAAMGFQYTERFAAFDCFDYVEN    | 234 |
| carnation                                                 | AVFAVIR-EITTLRAF CRAFTITWNQMLFAKSPPENWQAKGYTHETRYAAFDVDFVQN     | 240 |
| shallot                                                   | MVAVIK-EYSTLRQVCRCYAPVVWNYMLLNEQPPANWD AKGFTENTKYAAFDTF DAVTN   | 233 |
| : : : : * * * . * * : * . * : . * * : * * * : : * * * : * |                                                                 |     |
| melon                                                     | HSAMKPLEGLVRLPTDIEKLAHDVHKTNLSLNKARRNEKLLSTSSKISGGQQACEVKGEFK   | 353 |
| cowpea                                                    | PAAIQPAEGLIRKPTSSEKIAHNTYKRLALDRSNRNEIYSNLNTEVTGGTLGPEISRNFN    | 284 |
| carya                                                     | TAAIPPEGLIRKPTSNEYIAHNTYKRIALDRSNRNEPFGNLQTEITGGRGFEEIERNHL     | 303 |
| narcissus                                                 | SAAVQPLEGLIRRP TP REKIAHDTHKDIALRAANRNQVFGNFSSGVTGGRNGPELTRNYG  | 296 |
| JaVC_A-31                                                 | SAAVQPFEG LIGRPTPAEKIAHNTHKRLALDRANRNEKYASFEAEVTGGHVGPEIERGIW   | 294 |
| JaVC_Bari                                                 | AAAVQPFEG LIRRP TP AEKIAHNTHKRLALDRANRNEKFANLEAEVTGGHVGPEIERSIW | 294 |
| carnation                                                 | PAAIQPLEGLLRIP TAEEKIAHATNKRRLALDRNRNARFSSTDSLVTGGMYGKDIKTNFN   | 300 |
| shallot                                                   | KAAIQPLEGLIRAP TDAERIAFATHKKLALAKNSQNSRYANTS AEVTGGFFGCVPKNNFR  | 293 |
| : * : * * * : * * : * . . * : * : * . : : : * * .         |                                                                 |     |

|           |        |     |
|-----------|--------|-----|
| melon     | GNGSCS | 359 |
| cowpea    | HAKK-- | 288 |
| carya     | RPNK-- | 307 |
| narcissus | NSGLR- | 301 |
| JaVC_A-31 | KR---- | 296 |
| JaVC_Bari | KR---- | 296 |
| carnation | GSNNSD | 306 |
| shallot   | ENRC-- | 297 |

---

**Percent Identity Matrix - created by Clustal 2.1**

|              | MYaV   | CPPMV  | carya  | NCLV   | A-31   | JaVC-Ba | CLV    | SLV    |
|--------------|--------|--------|--------|--------|--------|---------|--------|--------|
| 1: melon     | 100.00 | 32.16  | 30.13  | 34.12  | 30.93  | 31.96   | 35.12  | 38.14  |
| 2: cowpea    | 32.16  | 100.00 | 52.48  | 50.52  | 51.79  | 52.50   | 42.60  | 36.73  |
| 3: carya     | 30.13  | 52.48  | 100.00 | 54.76  | 48.30  | 47.96   | 38.57  | 36.43  |
| 4: narcissus | 34.12  | 50.52  | 54.76  | 100.00 | 56.16  | 56.85   | 39.08  | 39.15  |
| 5: JaVC A-31 | 30.93  | 51.79  | 48.30  | 56.16  | 100.00 | 90.88   | 39.50  | 36.92  |
| 6: JaVC Bari | 31.96  | 52.50  | 47.96  | 56.85  | 90.88  | 100.00  | 38.79  | 36.20  |
| 7: carnation | 35.12  | 42.60  | 38.57  | 39.08  | 39.50  | 38.79   | 100.00 | 44.44  |
| 8: shallot   | 38.14  | 36.73  | 36.43  | 39.15  | 36.92  | 36.20   | 44.44  | 100.00 |

---
